# Supplementary material for: Signalling strength determines proapoptotic functions of STING
Source: PubMed Central journal article supplement (PMC5585373; doi:10.1038/s41467-017-00573-w), 2017-09-05
Supplement: 41467_2017_573_MOESM1_ESM.pdf [file 41467_2017_573_MOESM1_ESM.pdf]

### **Description of Supplementary Files**

File name: Supplementary Information

Description: Supplementary figures.

# Supplementary Figure 1

**a**

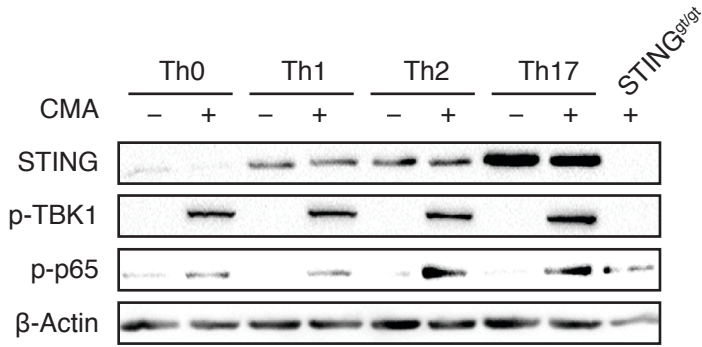

**b**

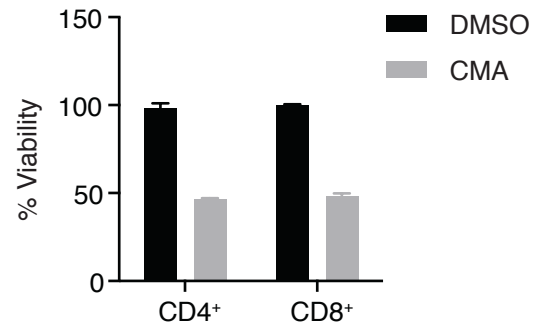

**c**

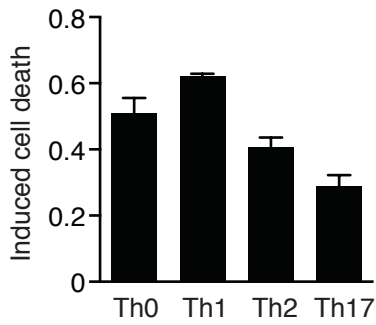

## Supplementary Fig. 1 Activation of STING in distinct T helper cell subsets

(a) Immunoblot analysis of untreated or 10-carboxymethyl-9-acridanone (CMA)-stimulated wild-type T cells after 3 days of Th0, Th1, Th2 or Th17 differentiation of naïve T cells. Cells were rested in medium overnight and stimulated with 0.25 mg/ml CMA for 1 h. Th0 cells from  $STING^{gt/gt}$  served as control. (b)  $CD4^+$  or  $CD8^+$  T cells isolated from the spleen of wild-type mice were stimulated with CMA (0.25 mg/ml) overnight. Cell viability was assessed by CellTiter Blue assay. (c) T cells were differentiated as in (a) and stimulated with 0.25 mg/ml CMA overnight and the percentage of apoptotic cells was assessed by Annexin V and 7-AAD staining. Mean and s.d. of technical replicates ( $n=2$ ) are shown (b, c). Data are representative of  $n=2$  independent experiments.

## Supplementary Figure 2

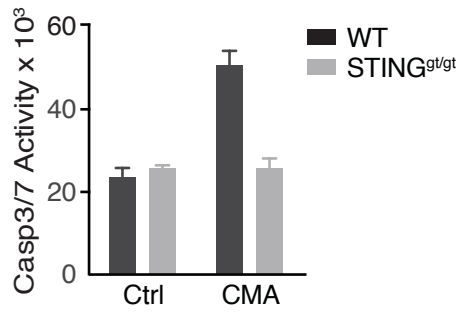

### Supplementary Fig. 2 STING activation induces Caspase 3/7 activity in T cells

T cells from WT and STING<sup>gt/gt</sup> mice were stimulated with 10-carboxymethyl-9-acridanone (CMA) or left untreated. After 6 h caspases 3/7 activity was determined. Mean and s.d. of n=2 technical replicates of one representative experiment from n=2 independent experiments are shown.

## Supplementary Figure 3

**a**

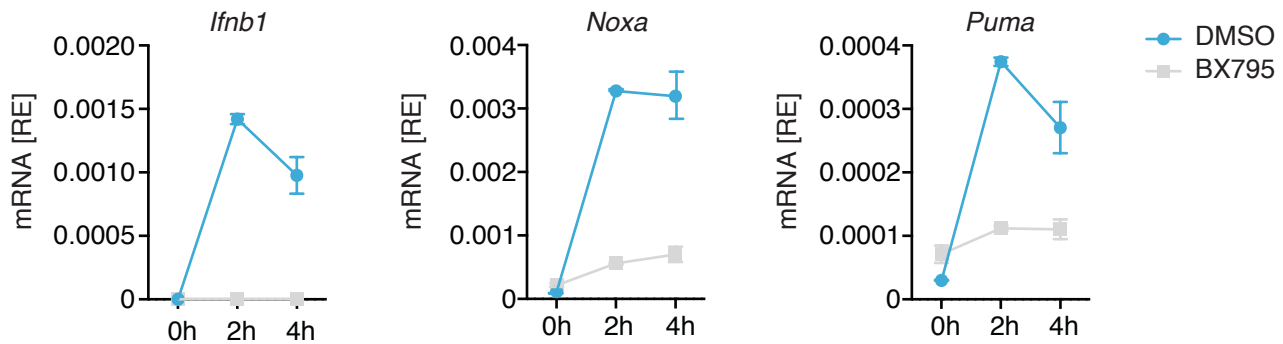

**b**

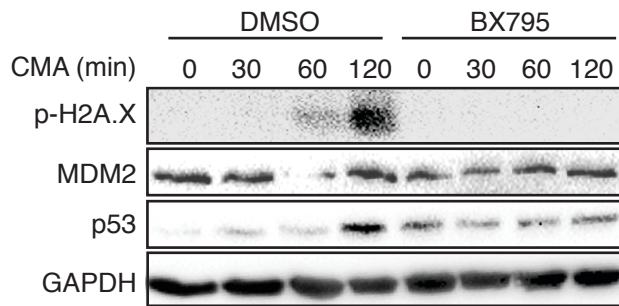

**c**

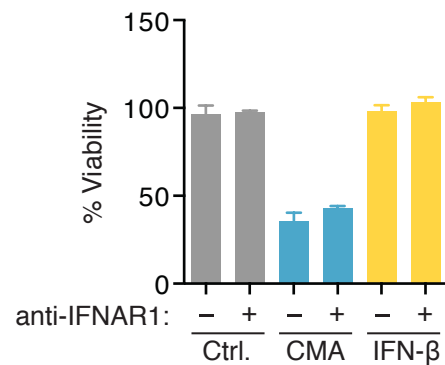

**d**

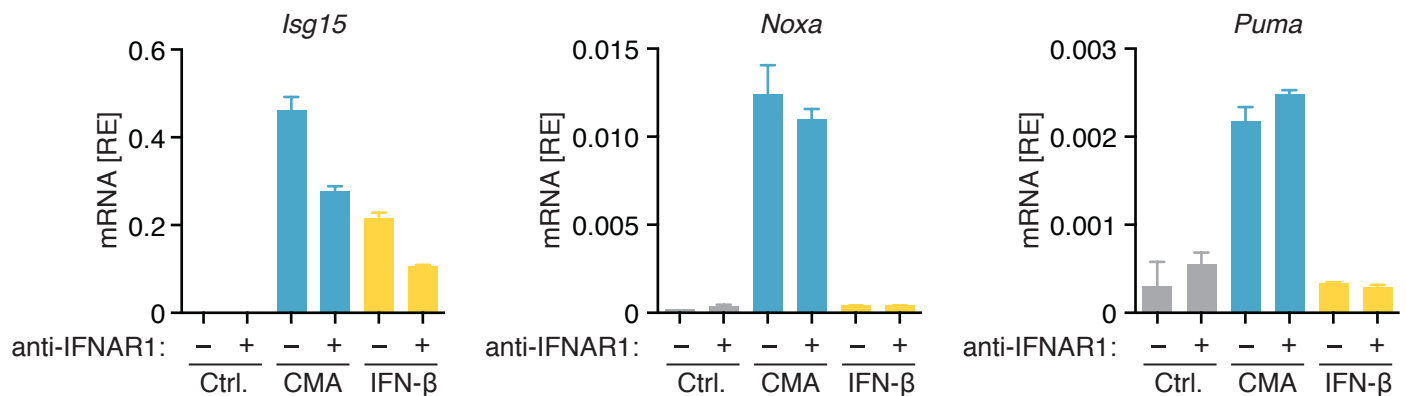

### Supplementary Fig. 3 TBK1-dependent and IFN-β-independent regulation of proapoptotic genes in T cells

(a) CD4<sup>+</sup> T cells were pretreated with the TBK1 inhibitor BX795 (2 μM) or DMSO for 30 min and then stimulated with 10-carboxymethyl-9-acridanone (CMA) (0.25 mg/ml) for the indicated time points. Gene expression was analyzed by RT-qPCR. (b) CD4<sup>+</sup> T cells were pretreated with the TBK1 inhibitor BX795 (2 μM) or DMSO for 30 min and then stimulated with CMA (0.25 mg/ml) for the indicated time points. Activation of indicated signaling molecules was assessed by immunoblot. (c, d) CD4<sup>+</sup> T cells were incubated with 10 μg/ml anti-IFNAR1 (MARI-5A3) and stimulated with CMA or 100 U recombinant IFN-β (Biolegend) or left untreated. After overnight incubation cell viability was assessed by CellTiter Blue assay (c) or after 4 h mRNA expression of depicted genes was examined by RT-qPCR (d). Data are representative for two independent experiments (b) or mean and s.d. of n=2 technical replicates from n=2 independent experiments are shown (a, c, d).

## Supplementary Figure 4

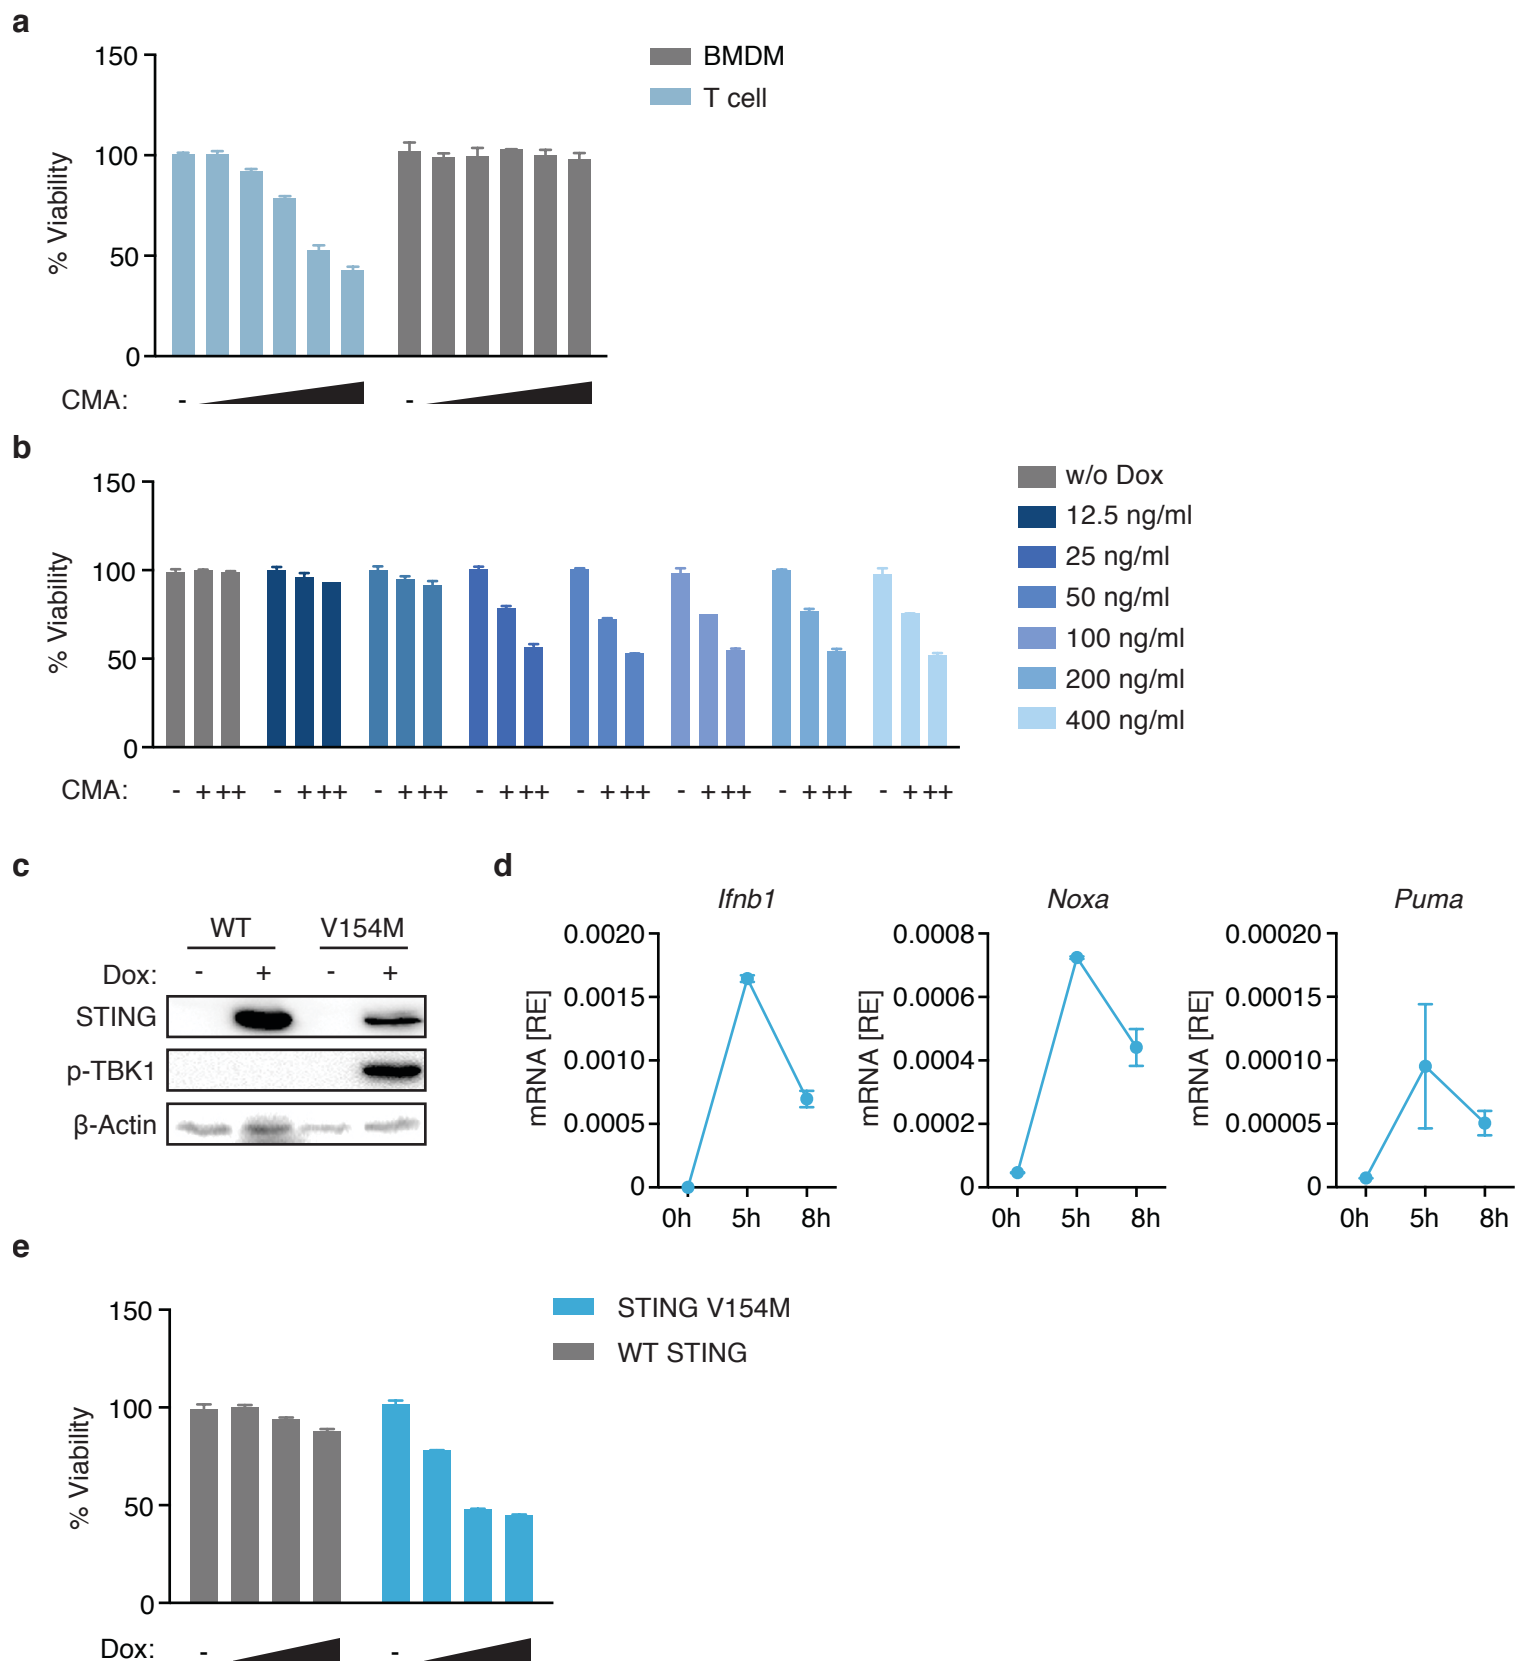

### Supplementary Fig. 4 Overexpression of STING renders macrophages susceptible to cell death

(a) T cells and BMDMs were stimulated with 10-carboxymethyl-9-acridanone (CMA) (serial dilution from 0.5  $\mu\text{g/ml}$  to 0.03125  $\mu\text{g/ml}$ ) or DMSO. After overnight incubation cell viability was assessed by CellTiter Blue Assay. (b) Immortalized macrophages transduced with an inducible construct for mouse STING were treated with doxycycline (Dox) as indicated for 5 h. Cells were then stimulated with CMA (0.25  $\mu\text{g/ml}$  or 0.5  $\mu\text{g/ml}$ ) or DMSO overnight and survival of macrophages was assessed by CellTiter Blue assay. (c) Immortalized macrophages transduced with an inducible construct for mouse STING (WT) or for a hyperactive mutant version of mouse STING (V154M) were incubated with doxycycline (0.1  $\mu\text{g/ml}$ ) for 5 h. STING level and phosphorylation of TBK1 were assessed by immunoblot. (d) Macrophages expressing doxycycline-inducible V154M mmSTING were incubated with doxycycline (0.1  $\mu\text{g/ml}$ ) for 5 h or 8 h and expression of indicated genes was quantified by RT-qPCR. (e) Survival of macrophages was measured by using CellTiter Blue Assay after overnight incubation with increasing doses of doxycycline (concentrations: 50 ng/ml, 100 ng/ml, 200 ng/ml). Representative results from n=2 independent experiments are shown (c) or mean and s.d. of technical replicates (n=2) of one representative experiments of n=2 independent experiments are shown (a, b, d, e).

## Supplementary Figure 5

**a**

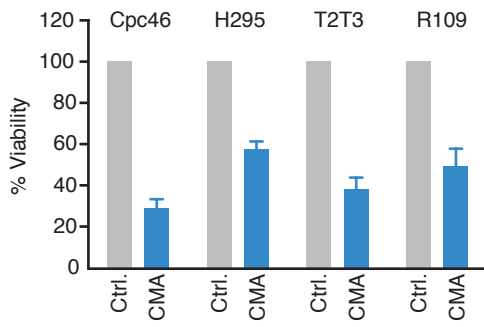

**b**

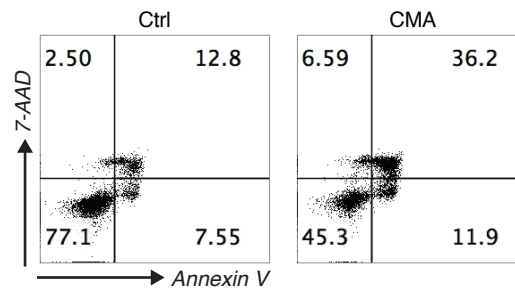

### Supplementary Fig. 5 Activation of STING in T cell-derived malignant cells induces apoptosis *in vitro*

(a) Various primary murine T-ALL cell lines were incubated with 10-carboxymethyl-9-acridanone (CMA) for 16 h and cell viability was assessed by CellTiter Blue assay. (b) T-ALL Cpc46 cells were treated with DMSO or stimulated with CMA and percentages of apoptotic cells were determined by flow cytometry analysis after 6 h using Annexin V and 7-AAD staining. Data are representative of three independent experiments (b) or mean and s.d. of technical replicates (n=2) of one representative experiment of n=3 independent experiments are shown.

## Supplementary Figure 6

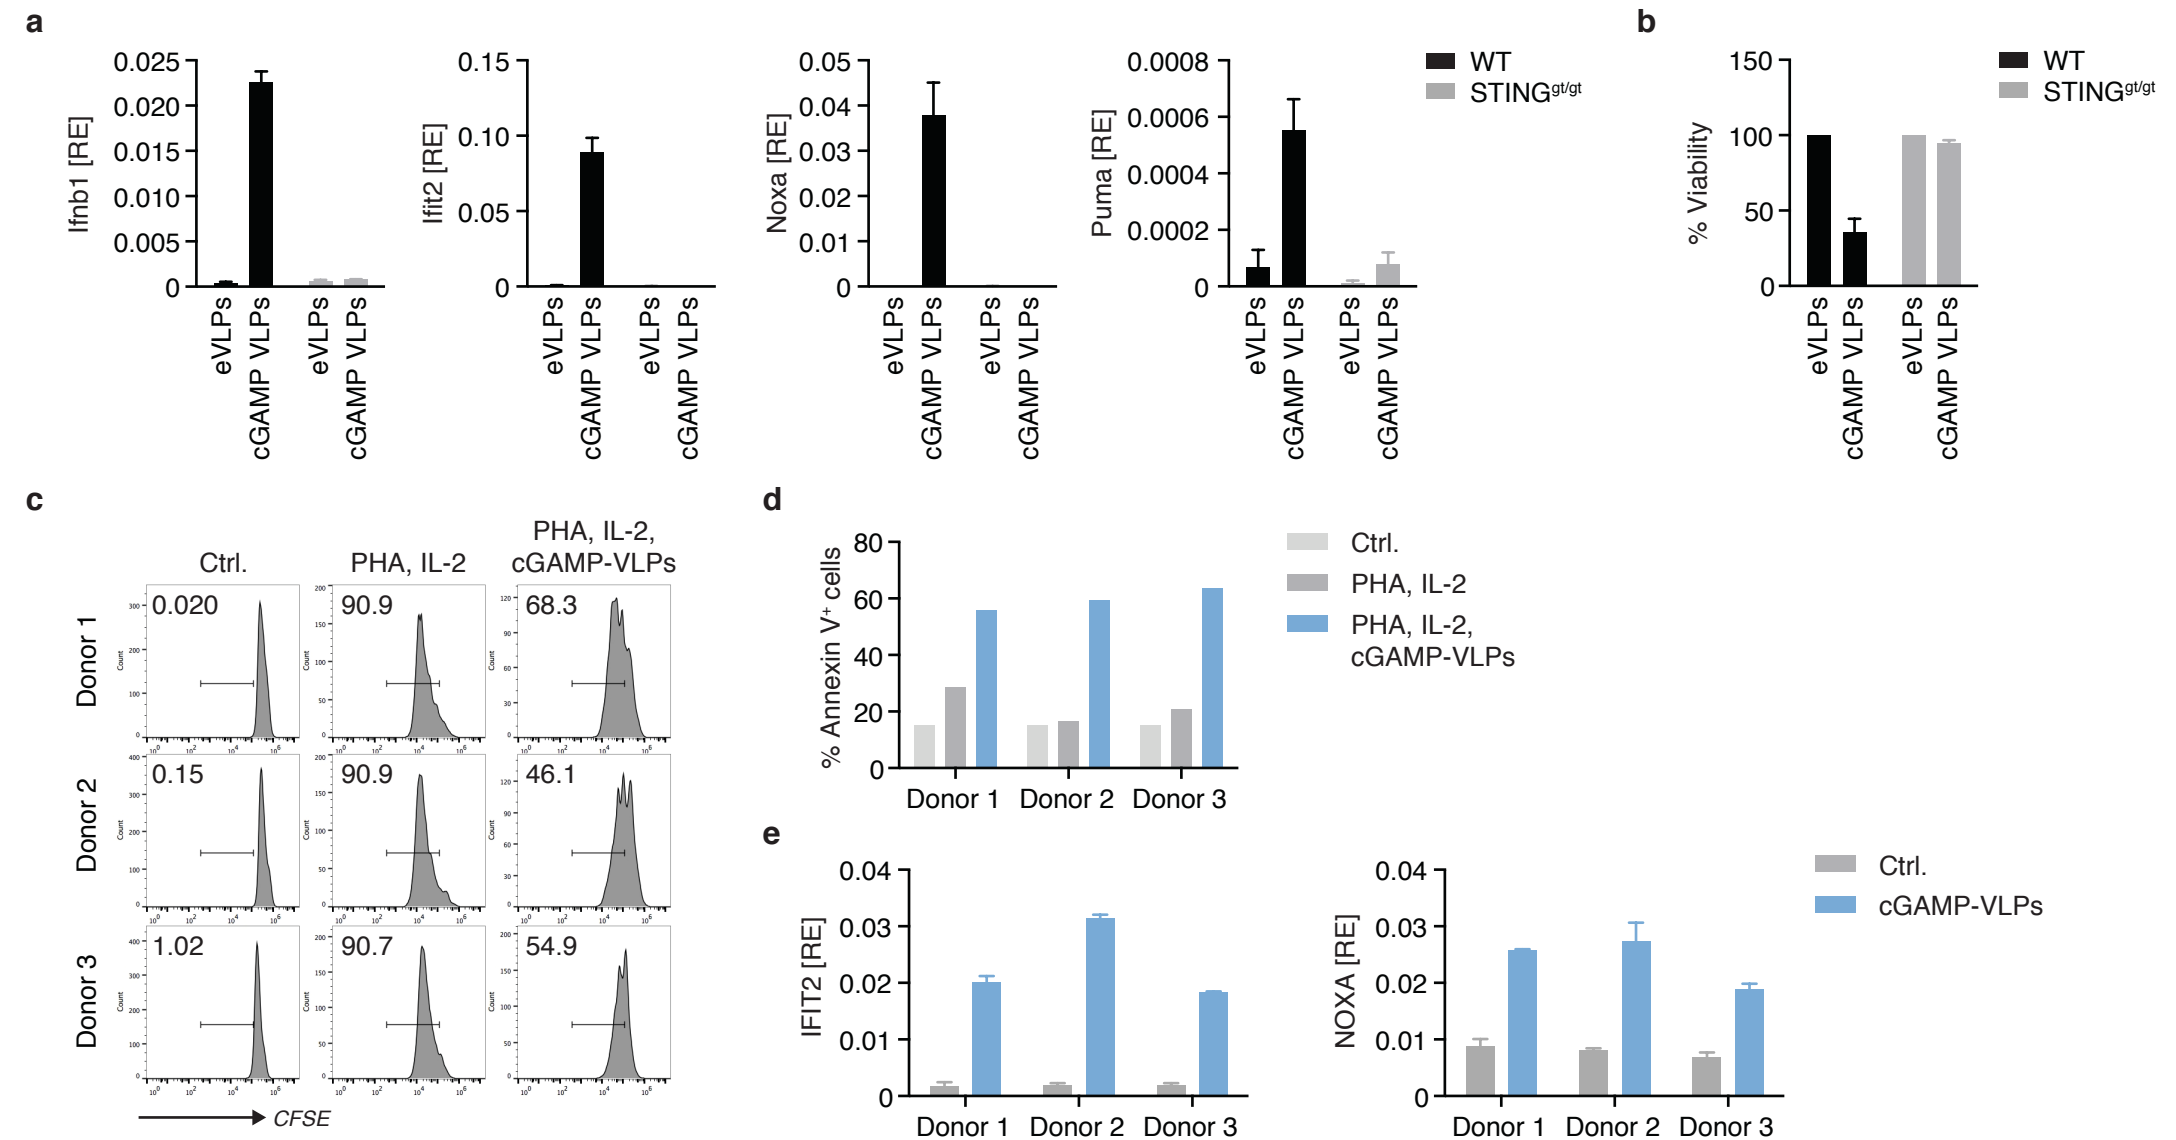

### Supplementary Fig. 6 cGAMP incorporated VLPs induce BH3-only protein expression and cell death in primary T cells

(a, b) T cells from WT or STING<sup>gt/gt</sup> mice were incubated with empty viral particles (eVLPs) or cGAMP containing viral particles (cGAMP VLPs). mRNA abundance of indicated genes was quantified by RT-qPCR after 16 h (a) and cell viability was assessed by CellTiter Blue assay after 16 h (b). (c-e) Primary human CD4<sup>+</sup> T cells from three donors were labeled with CFSE and either activated with PHA-L and IL-2 or cultured in T cell medium. At day 1, cGAMP VLPs were added to the cell culture medium. At day 5 CFSE dilution and Annexin V positive cells were assessed by FACS analysis (c, d). Human CD4<sup>+</sup> T cells were expanded with PHA-L and IL-2 for 5 days, incubated with eVLPs or cGAMP VLPs and mRNA abundance of indicated genes was quantified by RT-qPCR after 4 h. Data are representative of three independent experiments (c) or mean and s.d. of technical replicates of n=3 independent experiments (a, b) or mean and s.d. of technical replicates of n=3 distinct donors (d, e) are shown.

## Supplementary Figure 7

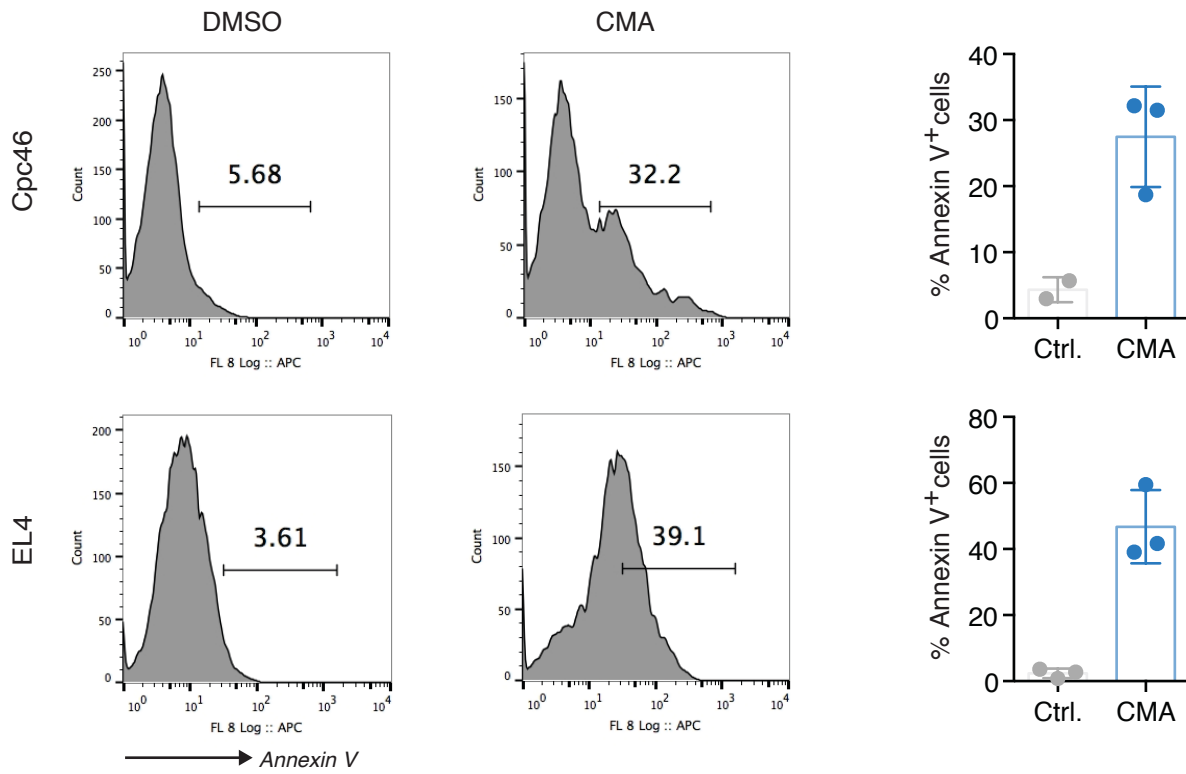

### Supplementary Fig. 7 STING activation induces *in vivo* tumor cell apoptosis

Cpc46 cells (upper panel) or EL4 cells (lower panel) were grown in Rag2<sup>-/-</sup>γc<sup>-/-</sup> mice. After overnight treatment with 10-carboxymethyl-9-acridanone (CMA) (500 μg intratumoral injection) or vehicle (Ctrl., DMSO) tumours were collected and the presence of apoptotic cells was assessed by Annexin V staining via flow cytometry. Left: representative results are depicted; Right: mean and s.d. of percentages of Annexin V positive cells are shown (Cpc46, n = 3 for CMA, n = 2 for ctrl.; EL4, n = 3 per treatment group).



## Supplementary Figure 8

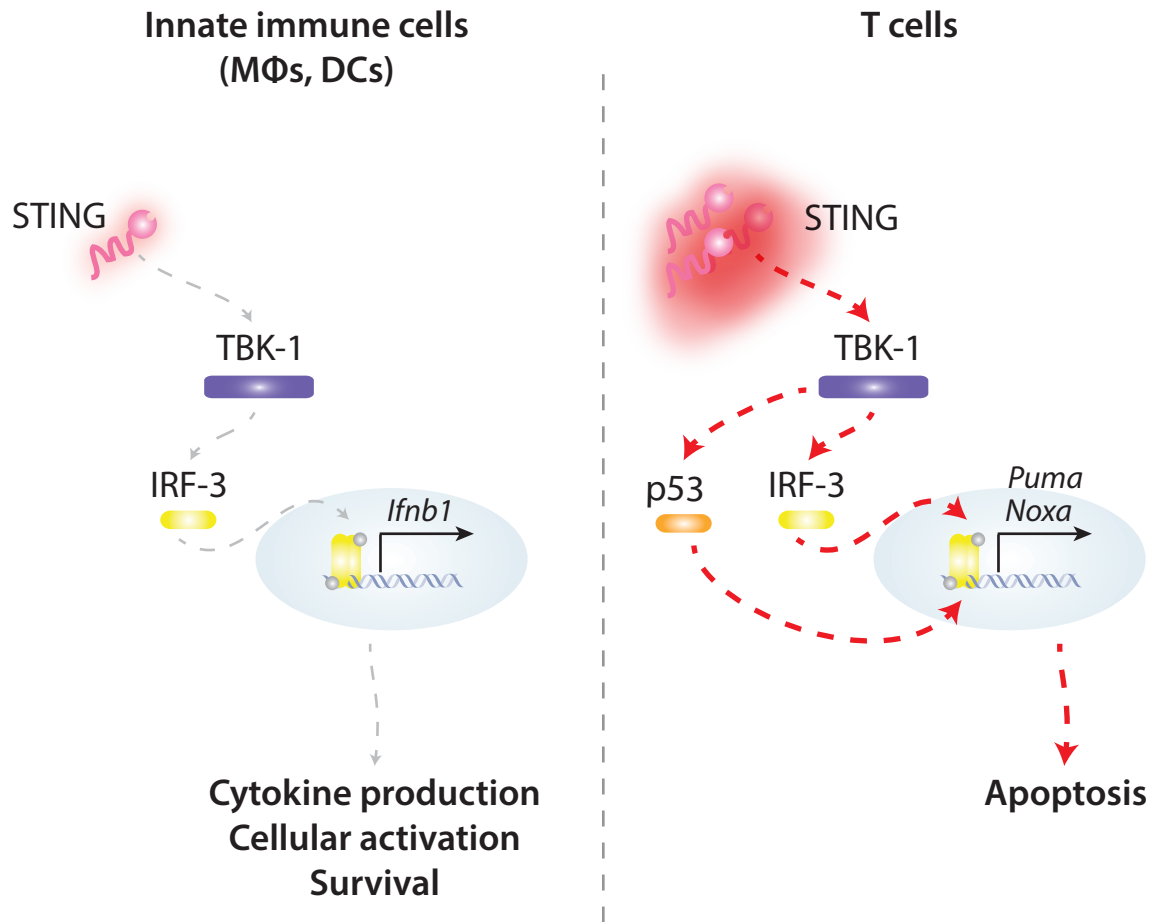

### Supplementary Figure 8: Model of cell type-specific responses to STING signaling

Innate immune cells including macrophages (MΦs) and DCs display lower STING expression, thereby generating a balanced response towards STING activators, which leads to cellular activation and cytokine production. T cells express high levels of STING and display an intensified response to STING activators, which leads to apoptosis.

Supplementary Figure 9

Fig. 1a

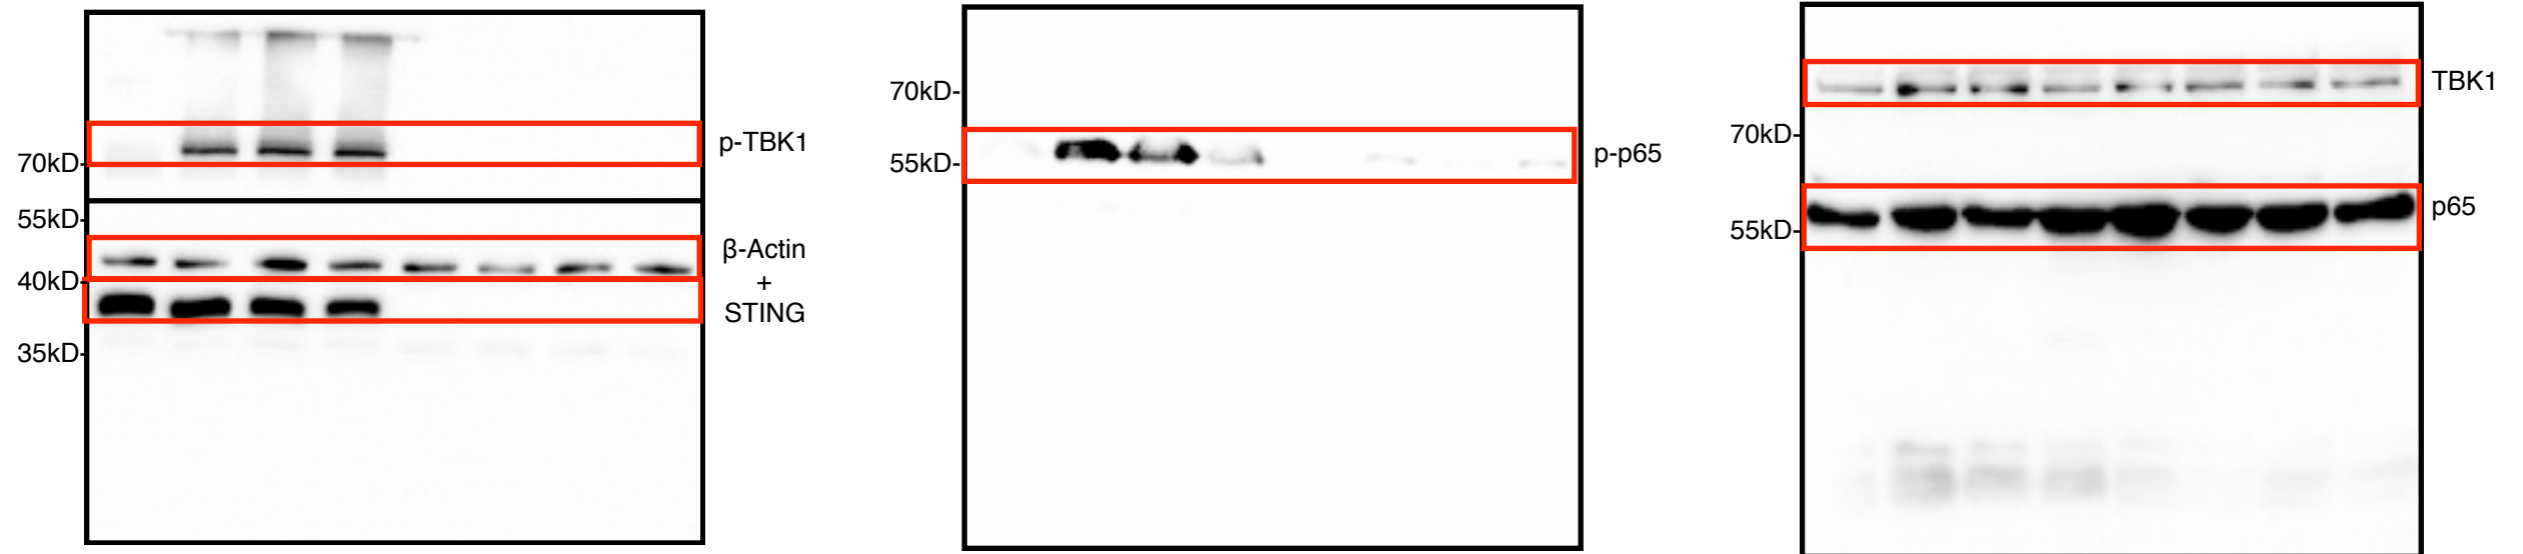

Fig. 1f

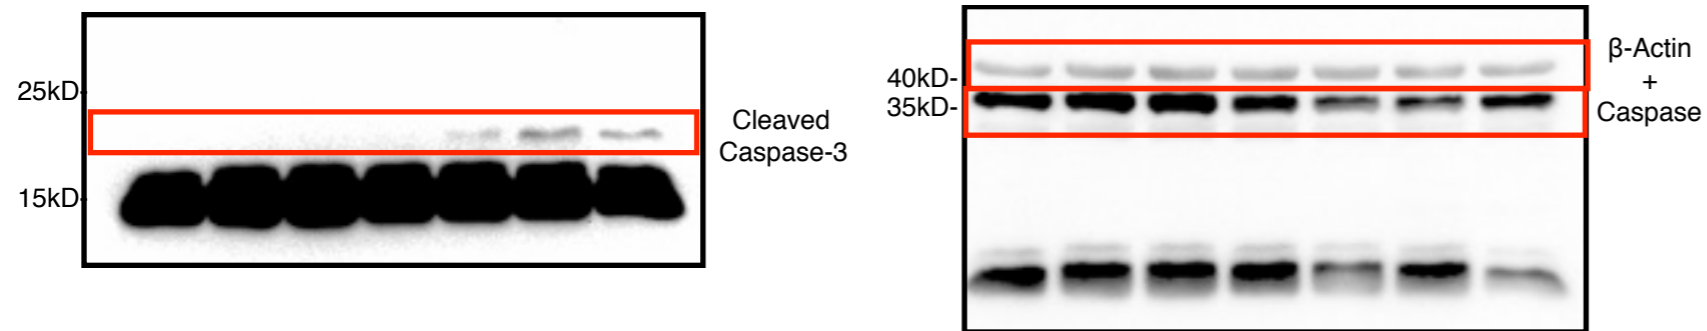

Fig. 2a

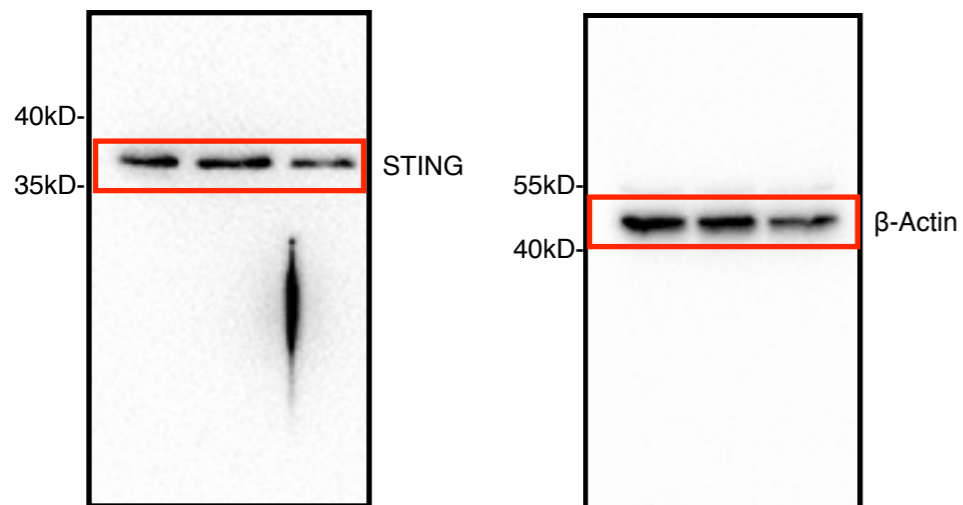

Fig. 4d

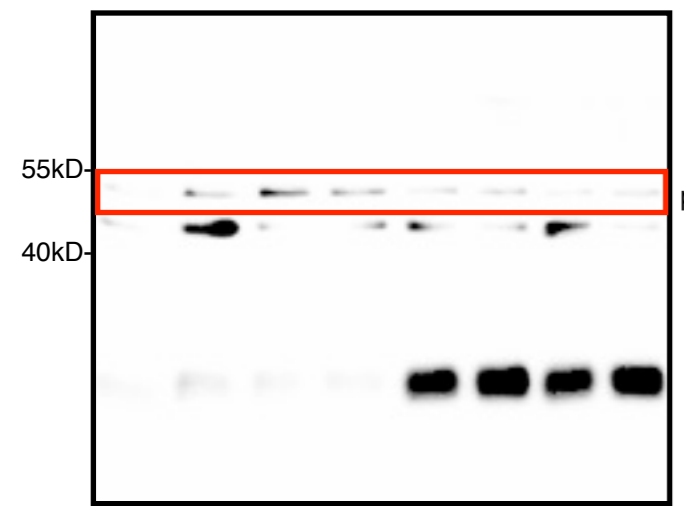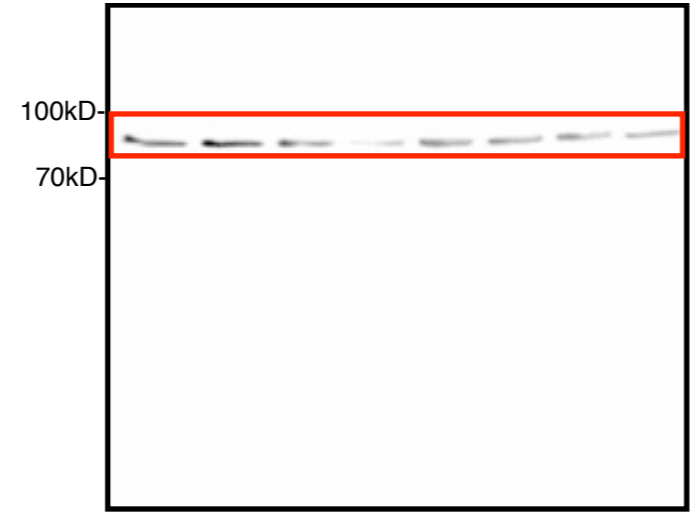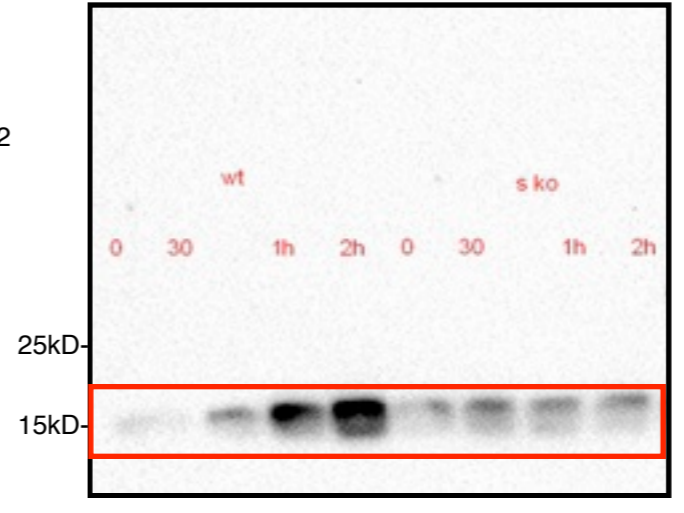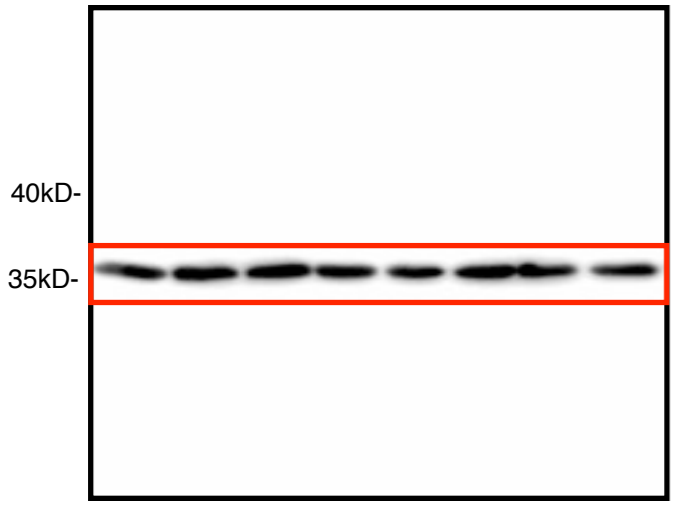

**Fig. 5a**

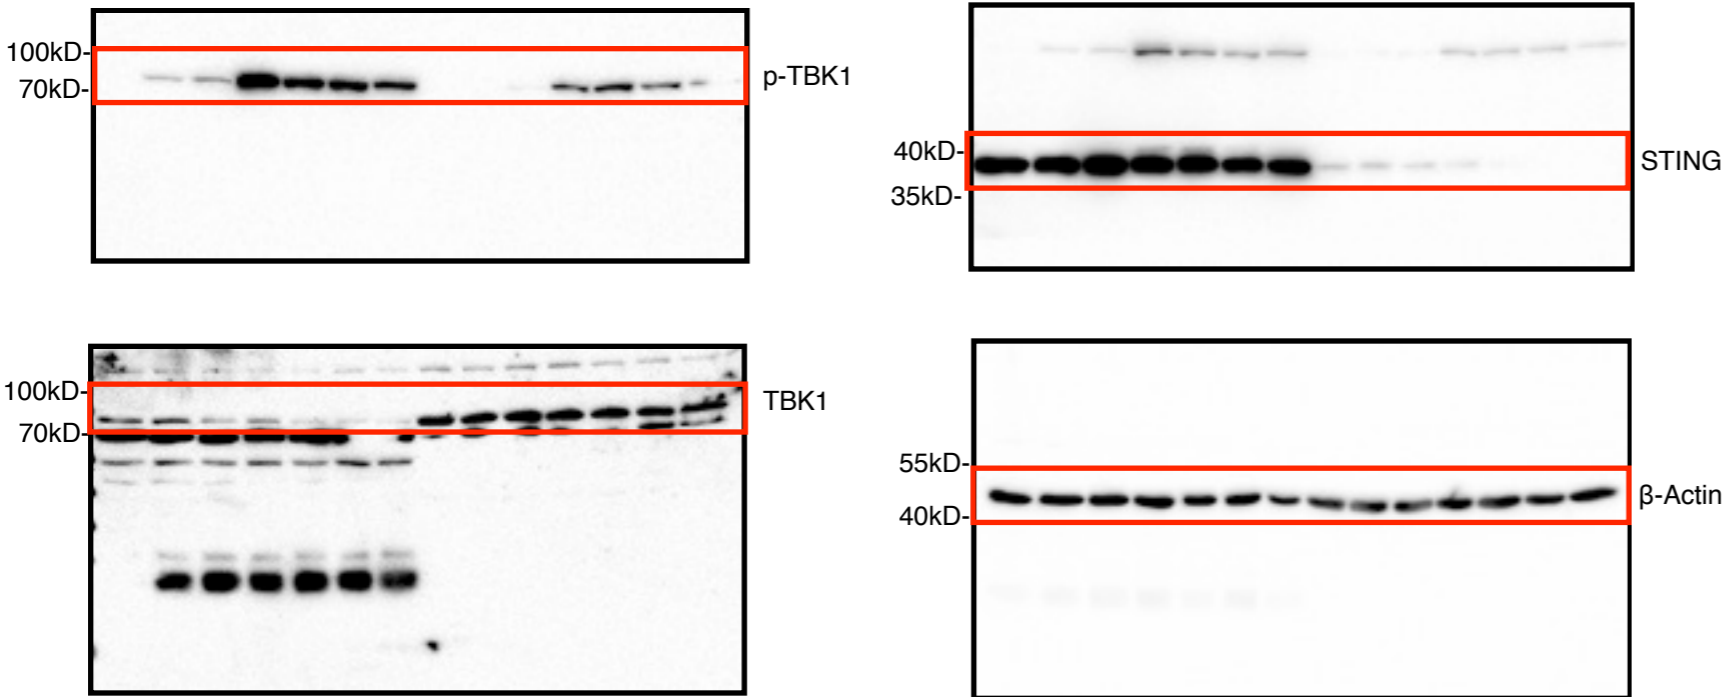

**Fig. 5d**

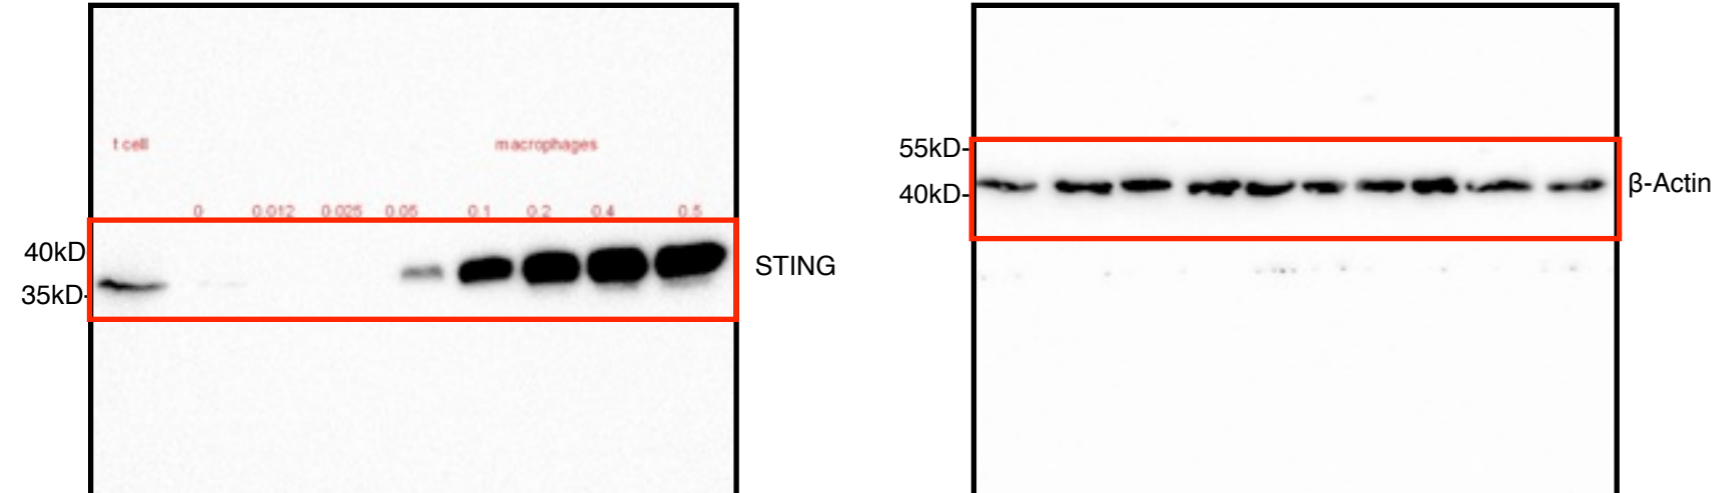

**Fig. 6a**

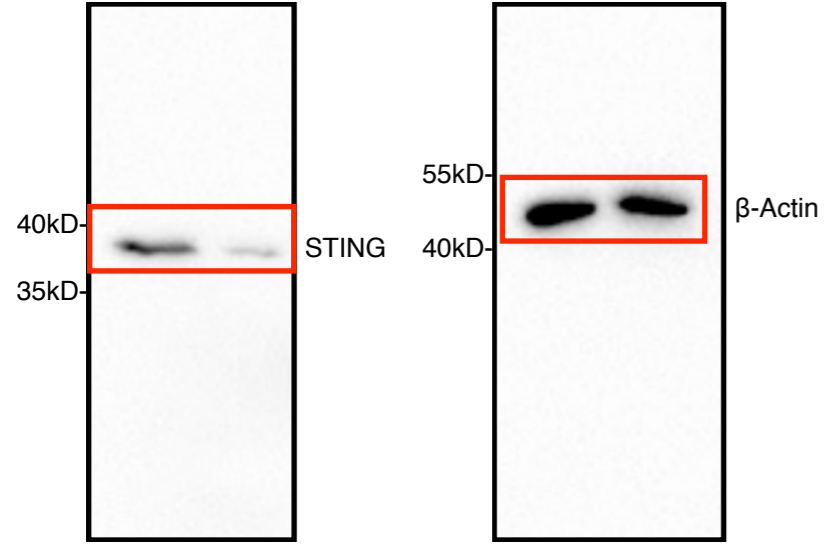

**Fig. 6b**

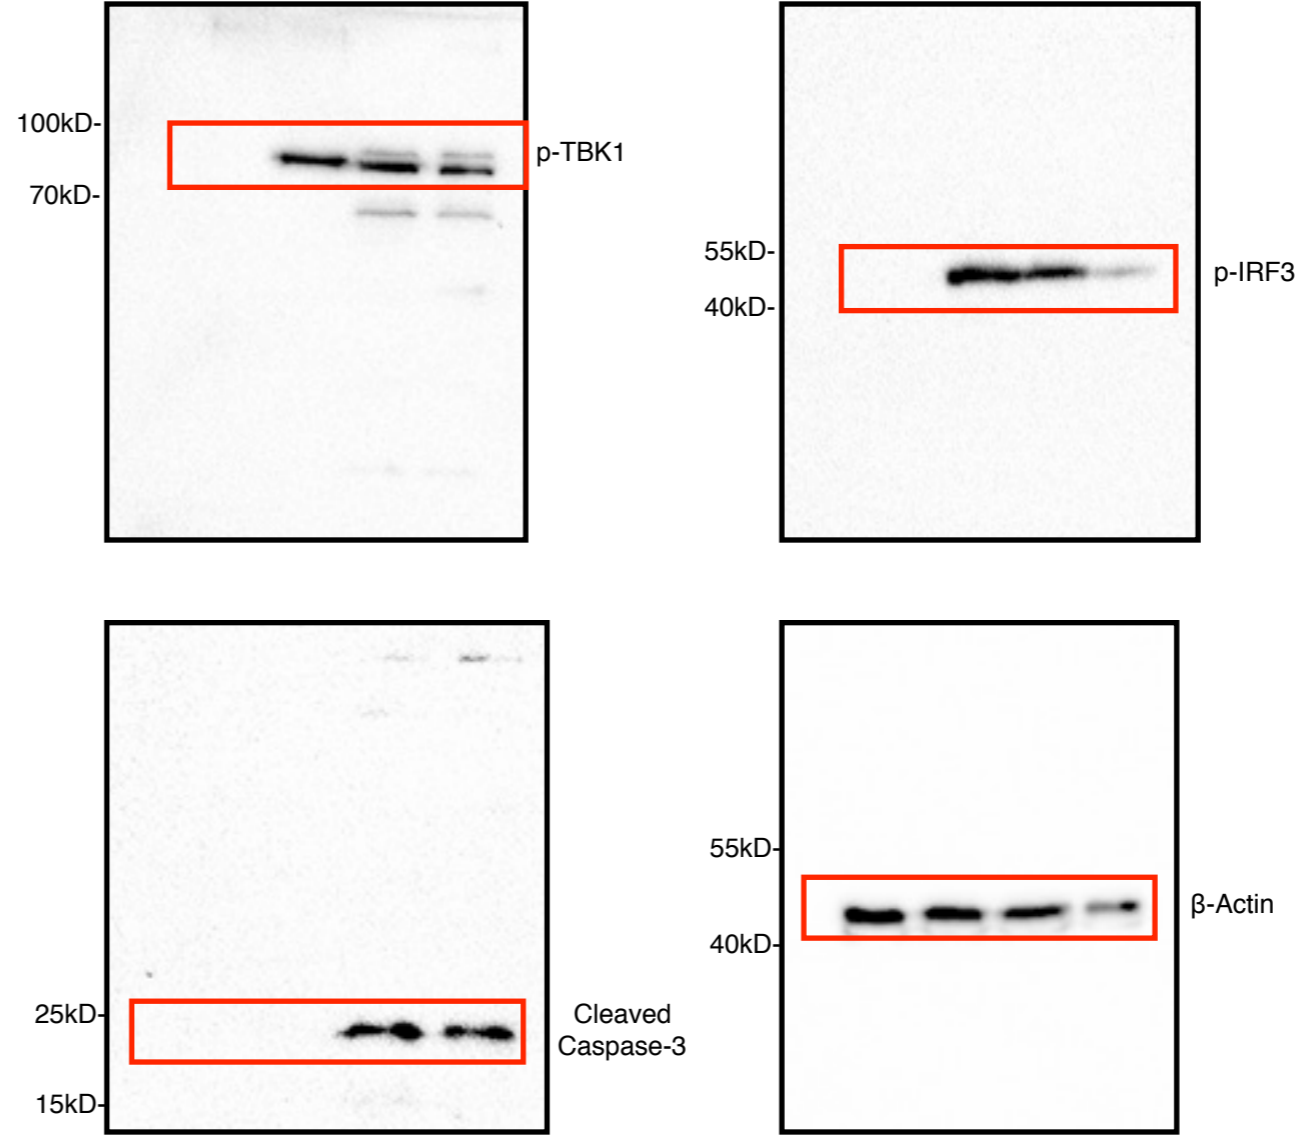

**Supplementary Fig. 9**

**Uncropped images of western blots**

Supplementary Figure 10

a

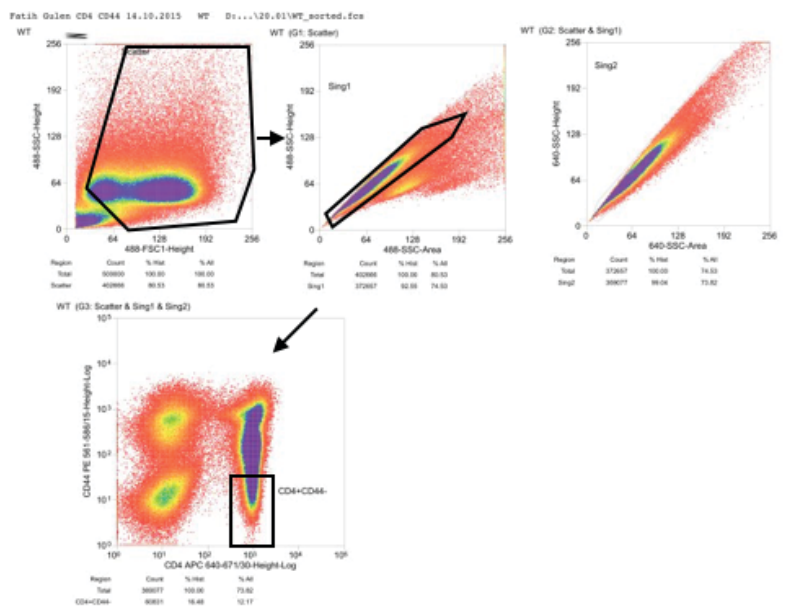

b

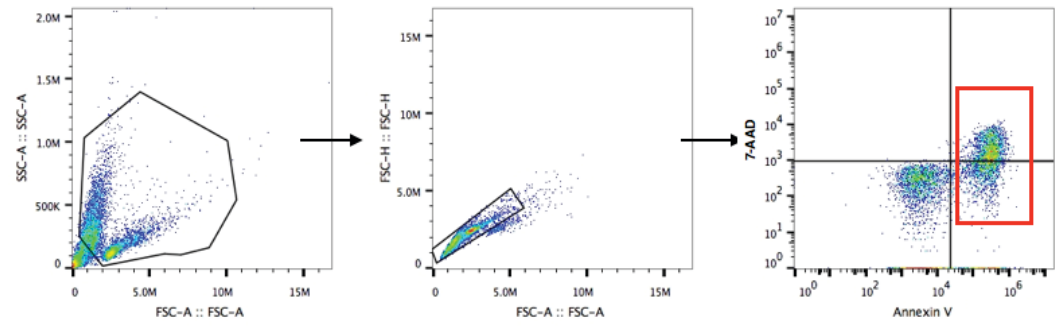

Supplementary Fig. 10 FACS gating strategy

(a) CD4<sup>+</sup>CD44<sup>-</sup> cell sorting strategy: Naive T cells were obtained by sorting CD4<sup>+</sup>CD44<sup>-</sup> cells as shown below in experiments in Fig. 1a, e and Fig. 3a, b. (b) Annexin V<sup>+</sup> cell analysis by FACS: Analysis strategy shown below was used to determine the Annexin V<sup>+</sup> population in all experiments including in Fig. 1e; Fig. 3d; Fig. 4a-c and Fig. 6f.
